# Supplementary material
Source: PubMed Central journal article supplement (PMC8530885)
Supplement: NIHMS1719772-supplement-1.pdf [file NIHMS1719772-supplement-1.pdf]

Table S1: General Housing Characteristics of Sampled Homes (n = 76)

| <b>Household Characteristics</b>                                | <b>Frequency (n)</b> | <b>Percent (%)</b> |
|-----------------------------------------------------------------|----------------------|--------------------|
| <b>Housing Type</b>                                             |                      |                    |
| Modern                                                          | 45                   | 59                 |
| Traditional                                                     | 18                   | 24                 |
| Mobile                                                          | 13                   | 17                 |
| <b>Heating Fuel Type*</b>                                       |                      |                    |
| EG                                                              | 21                   | 28                 |
| Combination EG-CW                                               | 26                   | 34                 |
| Solid fuel CW                                                   | 29                   | 38                 |
| <b>Floor Component</b>                                          |                      |                    |
| Wood                                                            | 26                   | 34                 |
| Concrete                                                        | 37                   | 49                 |
| Packed Earth                                                    | 9                    | 12                 |
| Wood Concrete                                                   | 2                    | 3                  |
| Other                                                           | 1                    | 1                  |
| Missing                                                         | 1                    | 1                  |
| <b>Dustiness of Interior</b>                                    |                      |                    |
| Dusty                                                           | 38                   | 50                 |
| Not Dusty                                                       | 37                   | 49                 |
| Missing                                                         | 1                    | 1                  |
| <b>Area Surrounding Home</b>                                    |                      |                    |
| Natural Undisturbed                                             | 31                   | 41                 |
| Actively Used Livestock Garden                                  | 12                   | 16                 |
| Cleared                                                         | 32                   | 42                 |
| Missing                                                         | 1                    | 1                  |
| <b>Parking Area</b>                                             |                      |                    |
| Paved-Gravel                                                    | 23                   | 30                 |
| Unpaved                                                         | 53                   | 70                 |
| <b>Carpet/Rug &gt;20% floor</b>                                 |                      |                    |
| No                                                              | 60                   | 79                 |
| Yes                                                             | 15                   | 20                 |
| Missing                                                         | 1                    | 1                  |
| <b>Building Parameters</b>                                      |                      |                    |
|                                                                 | <b>Mean</b>          | <b>SD</b>          |
| Area of Home (m <sup>2</sup> )                                  | 97.3                 | 67.7               |
| Height (m)                                                      | 3.7                  | 1.2                |
| Number of Rooms                                                 | 3.8                  | 1.9                |
| Number of Interior Doors                                        | 3.9                  | 2.3                |
| Number of Exterior Doors                                        | 1.9                  | 0.8                |
| Number of Windows                                               | 8.8                  | 3.5                |
| Number of Exterior Windows                                      | 6.6                  | 3.9                |
| *EG= Electric Gas, EG-CW= Electric Gas Coal Wood, CW= Coal Wood |                      |                    |
